# Supplementary material for: Biomass-derived chemical substitutes for bisphenol A: recent advancements in catalytic synthesis
Source: Royal Society of Chemistry journal article supplement (doi:10.1039/d0cs00179a), 2020-01-01
Supplement: d0cs00179a1.pdf [file d0cs00179a1.pdf]

Supporting Information for

**Biomass-derived chemical substitutes for bisphenol A: recent  
advancements in catalytic synthesis**

Francesca Liguori, Carmen Moreno-Marrodan and Pierluigi Barbaro

*Consiglio Nazionale delle Ricerche, Istituto di Chimica dei Composti Organo Metallici  
Via Madonna del Piano 10, 50019 Sesto Fiorentino, Firenze (Italy)*

**Table S1** Harmonised Classification and Labelling of Hazardous substances (according to the Annex VI tab. 3.1 of regulation (EC) N° 1272/2008 as amended by commission regulation (EU) 2016/1179)<sup>a</sup> for Bisphenol A and replacements derived from cellulosic biomass

| Entry | Structure                                                                           | IUPAC name                                                         | EC List name <sup>b</sup>                     | EC List N° <sup>c</sup> | CAS N°   | REACH Restriction, Authorisation SVHC <sup>d</sup> , Evaluation, Registration; CLP <sup>g</sup> Notifications,                                                                                                                                                                                                             | Hazard Class and category Codes                      | Hazard statement codes        | Specific Concentration limit, M-Factor, Acute Toxic estimate (ATE) |
|-------|-------------------------------------------------------------------------------------|--------------------------------------------------------------------|-----------------------------------------------|-------------------------|----------|----------------------------------------------------------------------------------------------------------------------------------------------------------------------------------------------------------------------------------------------------------------------------------------------------------------------------|------------------------------------------------------|-------------------------------|--------------------------------------------------------------------|
| 1     | 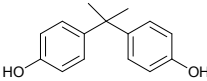   | 2,2-bis(4-hydroxyphenyl)propane                                    | 4,4'-isopropylidenediphenol; Bisphenol A; BPA | 201-245-8               | 80-05-7  | <b>Restriction:</b> the concentration in market thermal paper must be < 0.02% wt since 02-01-2020<br><b>Candidate list of SVHC for Authorisation:</b> *Reproductive Toxicity Categ. 1B (art. 57c); *Endocrine Disrupting properties for environment and Human health (art. 57 f)<br><b>CLP notification:</b> C&L inventory | REPR. 1B<br>STOT. SE 3<br>EYE DAM. 1<br>SKIN SENS. 1 | H360F<br>H335<br>H318<br>H317 | n.d.                                                               |
| 2     |    | (3R, 3aR, 6S, 6aR)-hexahydrofuro[3,2-b]furan-3,6-diol (isosorbide) | 1,4:3,6-dianhydro-D-glucitol                  | 211-492-3               | 652-67-5 | <b>Restriction:</b> None<br><b>Authorisation SVHC:</b> None<br><b>Evaluation:</b> None<br><b>Registration:</b> pre-registered<br>By notifications to ECHA in REACH: registrations <b>no hazards have been classified</b>                                                                                                   | n.d.                                                 | n.d.                          | n.d.                                                               |
| 3     |    | (3R, 3aR, 6R, 6aR)-hexahydrofuro[3,2-b]furan-3,6-diol (isomannide) | 1,4:3,6-dianhydro-D-mannitol                  | 211-374-1               | 641-74-7 | <b>Restriction:</b> None<br><b>Authorisation SVHC:</b> None<br><b>Evaluation:</b> None<br><b>Registration:</b> Annex III<br>By majority of notifications to ECHA in CLP notifications: <b>no hazards have been classified</b>                                                                                              | n.d.                                                 | n.d.                          | n.d.                                                               |
| 4     |  | (3S, 3aR, 6S, 6aR)-hexahydrofuro[3,2-b]furan-3,6-diol (isoidide)   | 1,4:3,6-dianhydro-L-idoitol                   | n.d.                    | n.d.     | <b>Restriction:</b> None<br><b>Authorisation SVHC:</b> None<br><b>Evaluation:</b> None<br><b>Registration:</b> None<br><b>CLP notification:</b> None                                                                                                                                                                       | n.d.                                                 | n.d.                          | n.d.                                                               |
| 5     |  | 1,4-Cyclohexandimethanol                                           | Cyclo-1,4-ylenedimethanol                     | 203-268-9               | 105-08-8 | <b>Restriction:</b> None<br><b>Authorisation SVHC:</b> None<br><b>Evaluation:</b> <u>Type CCH<sup>e</sup></u> , Scope: Comprehensive; Status: Follow up; <u>Type TPE<sup>f</sup></u> , Scope: testing proposal; Status: Concluded<br><b>Registration:</b> pre-registered<br><b>CLP notification:</b> C&L inventory         | EYE IRRIT. 2<br>EYE DAM. 1                           | H319<br>H318                  | n.d.                                                               |

<sup>a</sup> Data Source: ECHA European Chemical Agency, <https://echa.europa.eu/it/home>; <sup>b,c</sup> European Community List Name and Number assigned by ECHA; <sup>d</sup> SVHC: Substance of Very High Concern; <sup>e</sup> CCH: Compliance Check Evaluation;

<sup>f</sup> TPE: Testing Proposal Evaluation; <sup>g</sup> CLP: Classification Labelling and Packaging

Table S1 (continued)

| Entry | Structure                                                                           | IUPAC name                                               | EC List name <sup>b</sup>         | EC list N° | CAS N°      | REACH Restriction, Authorisation SVHC <sup>d</sup> Evaluation, Registration; CLP <sup>e</sup> Notifications                                                                                                                           | Hazard Class and category Codes               | Hazard statement codes       | Specific Concentration limit, M-Factor, Acute Toxic estimate (ATE) |
|-------|-------------------------------------------------------------------------------------|----------------------------------------------------------|-----------------------------------|------------|-------------|---------------------------------------------------------------------------------------------------------------------------------------------------------------------------------------------------------------------------------------|-----------------------------------------------|------------------------------|--------------------------------------------------------------------|
| 6     | 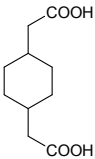   | 1,4-Cyclohexanedicarboxylic Acid (cis and trans mixture) | Cyclohexane-1,4-dicarboxylic acid | 214-068-6  | 1076-97-7   | <b>Restriction:</b> None<br><b>Authorisation SVHC:</b> None<br><b>Evaluation:</b> Type TPE <sup>f</sup> , Scope: testing proposal; Status: Concluded<br><b>Registration:</b> pre-registered<br><b>CLP Notification:</b> C&L inventory | Eye Irrit. 2<br>Acute Tox. 4<br>Skin Irrit. 2 | H319<br>H302<br>H315<br>H335 | n.d.                                                               |
| 7     |    | 3-hydroxymethyl cyclopentan-1-ol                         | n.d.                              | n.d.       | 159766-11-7 | <b>Restriction:</b> None<br><b>Authorisation SVHC:</b> None<br><b>Evaluation:</b> None<br><b>Registration:</b> None<br><b>CLP Notification:</b> None                                                                                  | n.d.                                          | n.d.                         | n.d.                                                               |
| 8     |    | 1,2-bis(furan-2-yl)-2-hydroxyethan-1-one                 | 2,2'-Furoin                       | 209-024-8  | 552-86-3    | <b>Restriction:</b> None<br><b>Authorisation SVHC:</b> None<br><b>Evaluation:</b> None<br><b>Registration:</b> Annex III<br><b>CLP Notification:</b> None                                                                             | n.d. <sup>g</sup>                             | n.d.                         | n.d.                                                               |
| 9     |    | 2-hydroxy-1,2-bis[5-(hydroxymethyl)furan-2-yl]ethanone   | n.d.                              | n.d.       | n.d.        | <b>Restriction:</b> None<br><b>Authorisation SVHC:</b> None<br><b>Evaluation:</b> None<br><b>Registration:</b> None<br><b>CLP Notification:</b> None                                                                                  | n.d.                                          | n.d.                         | n.d.                                                               |
| 10    |   | 1,2-bis[5-(hydroxymethyl)furan-2-yl]ethan-1,2-diol       | n.d.                              | n.d.       | n.d.        | <b>Restriction:</b> None<br><b>Authorisation SVHC:</b> None<br><b>Evaluation:</b> None<br><b>Registration:</b> None<br><b>CLP Notification:</b> None                                                                                  | n.d.                                          | n.d.                         | n.d.                                                               |
| 11    |  | 1,2-bis[5-(hydroxymethyl)furan-2-yl]ethan-1,2-dione      | n.d.                              | n.d.       | n.d.        | <b>Restriction:</b> None<br><b>Authorisation SVHC:</b> None<br><b>Evaluation:</b> None<br><b>Registration:</b> None<br><b>CLP Notification:</b> None                                                                                  | n.d.                                          | n.d.                         | n.d.                                                               |

<sup>a</sup> Data Source: ECHA European Chemical Agency, <https://echa.europa.eu/it/home>; <sup>b,c</sup> European Community List Name and Number assigned by ECHA; <sup>d</sup> SVHC: Substance of Very High Concern; <sup>e</sup> CCH: Compliance Check Evaluation; <sup>f</sup> TPE: Testing Proposal Evaluation; <sup>g</sup> CLP: Classification Labelling and Packaging

Table S1 (continued)

| Entry | Structure                                                                           | IUPAC name                                                                                                                                          | EC List name <sup>b</sup>      | EC list N <sup>o</sup> | CAS N <sup>o</sup> | REACH Restriction, Authorisation SVHC <sup>d</sup> Evaluation, Registration; CLP <sup>e</sup> Notifications                                                        | Hazard Class and category Codes                                                            | Hazard statement codes                       | Specific Concentration limit, M-Factor, Acute Toxic estimate (ATE) |
|-------|-------------------------------------------------------------------------------------|-----------------------------------------------------------------------------------------------------------------------------------------------------|--------------------------------|------------------------|--------------------|--------------------------------------------------------------------------------------------------------------------------------------------------------------------|--------------------------------------------------------------------------------------------|----------------------------------------------|--------------------------------------------------------------------|
| 12    | 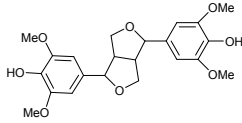   | 4-[6-(4-hydroxy-3,5-dimethoxyphenyl)-1,3,3 <i>a</i> ,4,6,6 <i>a</i> -hexahydrofuro[3,4-c]furan-3-yl]-2,6-dimethoxyphenol<br><b>(syringaresinol)</b> | n.d.                           | n.d.                   | 21453-71-4         | <b>Restriction:</b> None<br><b>Authorisation SVHC:</b> None<br><b>Evaluation:</b> None<br><b>Registration:</b> None<br><b>CLP Notification:</b> None               | n.d.                                                                                       | n.d.                                         | n.d.                                                               |
| 13    |    | (3 <i>R</i> ,6 <i>S</i> )-hexahydro[3,2- <i>b</i> ]furan-3,6-diyl bis[3-(4-hydroxy-3-methoxyphenyl)propanoate]<br><b>(isosorbidediferulate)</b>     | n.d.                           | n.d.                   | n.d.               | <b>Restriction:</b> None<br><b>Authorisation SVHC:</b> None<br><b>Evaluation:</b> None<br><b>Registration:</b> None<br><b>CLP Notification:</b> None               | n.d.                                                                                       | n.d.                                         | n.d.                                                               |
| 14    |    | [5-[2-[5-(hydroxymethyl)furan-2-yl]propan-2-yl]furan-2-yl]methanol                                                                                  | n.d.                           | n.d.                   | n.d.               | <b>Restriction:</b> None<br><b>Authorisation SVHC:</b> None<br><b>Evaluation:</b> None<br><b>Registration:</b> None<br><b>CLP Notification:</b> None               | n.d.                                                                                       | n.d.                                         | n.d.                                                               |
| 15    |   | 2,5-bis(hydroxymethyl)furan                                                                                                                         | Furan-2,5-diyl dimethanol      | 217-544-1              | 1883-75-6          | <b>Restriction:</b> None<br><b>Authorisation SVHC:</b> None<br><b>Evaluation:</b> None<br><b>Registration:</b> Annex III<br><b>CLP Notification:</b> C&L inventory | Acute Tox. 4<br>Acute Tox. 4<br>Skin Irrit. 2<br>Eye Irrit. 2<br>Acute Tox. 4<br>STOT SE 3 | H302<br>H312<br>H315<br>H319<br>H332<br>H335 | n.d.                                                               |
| 16    |  | 2,5-bis(hydroxymethyl)(tetrahydrofuran)                                                                                                             | 2,5-anhydro-3,4-dideoxyhexitol | 203-239-0              | 104-80-3           | <b>Restriction:</b> None<br><b>Authorisation SVHC:</b> None<br><b>Evaluation:</b> None<br><b>Registration:</b> Annex III<br><b>CLP Notification:</b> C&L inventory | Eye Irrit. 2<br>Skin Irrit. 2<br>STOT SE 3                                                 | H319<br>H315<br>H335                         | STOT SE 3; H335<br>C>10%                                           |

<sup>a</sup>Data Source: ECHA European Chemical Agency, <https://echa.europa.eu/it/home>; <sup>b,c</sup> European Community List Name and Number assigned by ECHA; <sup>d</sup> SVHC: Substance of Very High Concern; <sup>e</sup> C&L: Compliance Check Evaluation; <sup>f</sup>TPE: Testing Proposal Evaluation; <sup>g</sup> CLP: Classification Labelling and Packaging

**Table S2** Harmonised Classification and Labelling of Hazardous substances (according to the Annex VI tab. 3.1 of regulation (EC) N° 1272/2008 as amended by commission regulation (EU) 2016/1179) <sup>a</sup> for substances derived from lignin or other biomass

| Entry | Structure                                                                           | IUPAC name                                                                                                                                                                | EC List name <sup>b</sup>                           | EC list N° | CAS N°    | REACH Restriction, Authorisation SVHC <sup>d</sup> Evaluation, Registration; CLP <sup>e</sup> Notifications                                                   | Hazard Class and category Codes | Hazard statement codes | Specific Concentration limit, M-Factor, Acute Toxic estimate (ATE) |
|-------|-------------------------------------------------------------------------------------|---------------------------------------------------------------------------------------------------------------------------------------------------------------------------|-----------------------------------------------------|------------|-----------|---------------------------------------------------------------------------------------------------------------------------------------------------------------|---------------------------------|------------------------|--------------------------------------------------------------------|
| 1     | 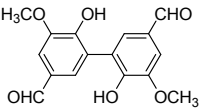   | 3-(5-formyl-2-hydroxy-3-methoxyphenyl)-4-hydroxy-5-methoxybenzaldehyde                                                                                                    | 6,6'-dihydroxy-5,5'-dimethoxy-biphenyl-dicarboxald. | 639-022-6. | 2092-49-1 | <b>Restriction:</b> None<br><b>Authorisation SVHC:</b> None<br><b>Evaluation:</b> None<br><b>Registration:</b> None<br><b>CLP Notification:</b> C&L inventory | Acute Tox.4<br>Eye Irrit. 2     | H302<br>H319           | n.d.<br>n.d.                                                       |
| 2     |    | (5,5',6,6'-tetramethoxybiphenyl-3,3'-diyl)dimethanol                                                                                                                      | n.d.                                                | n.d.       | n.d.      | <b>Restriction:</b> None<br><b>Authorisation SVHC:</b> None<br><b>Evaluation:</b> None<br><b>Registration:</b> None<br><b>CLP Notification:</b> None          | n.d.                            | n.d.                   | n.d.                                                               |
| 3     |    | (1R,2S)-1,2-bis(4-hydroxy-3-methoxyphenyl)ethane-1,2-diol                                                                                                                 | n.d.                                                | n.d.       | 4464-75-9 | <b>Restriction:</b> None<br><b>Authorisation SVHC:</b> None<br><b>Evaluation:</b> None<br><b>Registration:</b> None<br><b>CLP Notification:</b> None          | n.d.                            | n.d.                   | n.d.                                                               |
| 4     |    | 4-(5-(hydroxymethyl)-5-methyl-1,3-dioxan-2-yl)-2-methoxyphenol                                                                                                            | n.d.                                                | n.d.       | n.d.      | <b>Restriction:</b> None<br><b>Authorisation SVHC:</b> None<br><b>Evaluation:</b> None<br><b>Registration:</b> None<br><b>CLP Notification:</b> None          | n.d.                            | n.d.                   | n.d.                                                               |
| 5     |    | 4,4'-(2,4,8,10-tetraoxaspiro[5.5]undecane-3,9-diyl)bis(2-methoxyphenol)                                                                                                   | n.d.                                                | n.d.       | n.d.      | <b>Restriction:</b> None<br><b>Authorisation SVHC:</b> None<br><b>Evaluation:</b> None<br><b>Registration:</b> None<br><b>CLP Notification:</b> None          | n.d.                            | n.d.                   | n.d.                                                               |
| 6     |  | <b>R=Me</b><br>3,3'-dimethoxy-5,5'-bis((E)-(methylimino)methyl)biphenyl-2,2'-diol<br><br><b>R=Et</b><br>5,5'-bis((E)-(ethylimino)methyl)-3,3'-dimethoxybiphenyl-2,2'-diol | n.d.                                                | n.d.       | n.d.      | <b>Restriction:</b> None<br><b>Authorisation SVHC:</b> None<br><b>Evaluation:</b> None<br><b>Registration:</b> None<br><b>CLP Notification:</b> None          | n.d.                            | n.d.                   | n.d.                                                               |
|       |                                                                                     |                                                                                                                                                                           | n.d.                                                | n.d.       | n.d.      | <b>Idem</b>                                                                                                                                                   | n.d.                            | n.d.                   | n.d.                                                               |

<sup>a</sup> Data Source: ECHA European Chemical Agency, <https://echa.europa.eu/it/home>; <sup>b,c</sup> European Community List Name and Number assigned by ECHA; <sup>d</sup> SVHC: Substance of Very High Concern; <sup>e</sup> CCH: Compliance Check Evaluation; <sup>f</sup> TPE: Testing Proposal Evaluation; <sup>g</sup> CLP: Classification Labelling and Packaging;

Table S2(continued)

| Entry | Structure | IUPAC name                                                                                                             | EC List name <sup>b</sup>                      | EC list N <sup>o</sup> | CAS N <sup>o</sup> | REACH Restriction, Authorisation SVHC <sup>d</sup> Evaluation, Registration; CLP <sup>e</sup> Notifications                                               | Hazard Class and category Codes | Hazard statement codes | Specific Concentration limit, M-Factor, Acute Toxic estimate (ATE) |
|-------|-----------|------------------------------------------------------------------------------------------------------------------------|------------------------------------------------|------------------------|--------------------|-----------------------------------------------------------------------------------------------------------------------------------------------------------|---------------------------------|------------------------|--------------------------------------------------------------------|
| 7     |           | 4,4'-(1Z,1'Z)-(4,4'-methylenebis(4,1-phenylene)bis(azan-1-yl-1-ylidene))bis(methan-1-yl-1-ylidene)bis(2-methoxyphenol) | n.d.                                           | n.d.                   | n.d.               | <b>Restriction:</b> None<br><b>Authorisation SVHC:</b> None<br><b>Evaluation:</b> None<br><b>Registration:</b> None<br><b>CLP Notification:</b> None      | n.d.                            | n.d.                   | n.d.                                                               |
| 8     |           | <b>R=H</b><br>5-[(5-hydroxy-4-methoxy-2-methylphenyl)methyl]-2-methoxy-4-methylphenol                                  | n.d.                                           | n.d.                   | n.d.               | <b>Restriction:</b> None<br><b>Authorisation SVHC:</b> None<br><b>Evaluation:</b> None<br><b>Registration:</b> None<br><b>CLP Notification:</b> None      | n.d.                            | n.d.                   | n.d.                                                               |
|       |           | <b>R=Me</b><br>5,5'-(ethane-1,1-diyl)bis(2-methoxy-4-methylphenol)                                                     | n.d.                                           | n.d.                   | n.d.               | <b>Idem</b>                                                                                                                                               | n.d.                            | n.d.                   | n.d.                                                               |
|       |           | <b>R=Et</b><br>5,5'-(propane-1,1-diyl)bis(2-methoxy-4-methylphenol)                                                    | n.d.                                           | n.d.                   | n.d.               | <b>Idem</b>                                                                                                                                               | n.d.                            | n.d.                   | n.d.                                                               |
| 9     |           | 4,4'-methylenebis(2-methoxyphenol)<br>(bisguaiacol F)                                                                  | n.d.                                           | n.d.                   | 3888-22-0          | <b>Restriction:</b> None<br><b>Authorisation SVHC:</b> None<br><b>Evaluation:</b> None<br><b>Registration:</b> None<br><b>CLP Notification:</b> None      | n.d.                            | n.d.                   | n.d.                                                               |
| 10    |           | 4-(3-hydroxy-4-methoxybenzyl)-2-methoxyphenol                                                                          | n.d.                                           | n.d.                   | 4464-75-9          | <b>Restriction:</b> None<br><b>Authorisation SVHC:</b> None<br><b>Evaluation:</b> None<br><b>Registration:</b> None<br><b>CLP Notification:</b> None      | n.d.                            | n.d.                   | n.d.                                                               |
| 11    |           | 4-(2-hydroxy-3-methoxybenzyl)-2-methoxyphenol                                                                          | n.d.                                           | n.d.                   | n.d.               | <b>Restriction:</b> None<br><b>Authorisation SVHC:</b> None<br><b>Evaluation:</b> None<br><b>Registration:</b> None<br><b>CLP Notification:</b> None      | n.d.                            | n.d.                   | n.d.                                                               |
| 12    |           | 5-[2-(4-hydroxyphenyl)ethyl]benzene-1,3-diol                                                                           | 1,3-Benzenediol, 5-[2-(4-hydroxyphenyl)ethyl]- | 611-651-0              | 58436-28-5         | <b>Restriction:</b> None<br><b>Authorisation SVHC:</b> None<br><b>Evaluation:</b> None<br><b>Registration:</b> Annex III<br><b>CLP Notification:</b> None | n.d.                            | n.d.                   | n.d.                                                               |

<sup>a</sup> Data Source: ECHA European Chemical Agency, <https://echa.europa.eu/it/home>; <sup>b,c</sup> European Community List Name and Number assigned by ECHA; <sup>d</sup> SVHC: Substance of Very High Concern; <sup>e</sup> CCH: Compliance Check Evaluation; <sup>f</sup> TPE: Testing Proposal Evaluation; <sup>g</sup> CLP: Classification Labelling and Packaging; <sup>h</sup> for Suspect mutagen, toxic reproduction, skin sensitiser, persistent in environment, hazardous

Table S2(continued)

| Entry | Structure | IUPAC name                                                                                           | EC List name <sup>b</sup>                       | EC list N <sup>o</sup> | CAS N <sup>o</sup> | REACH Restriction, Authorisation SVHC <sup>d</sup> Evaluation, Registration; CLP <sup>g</sup> Notifications                                                   | Hazard Class and category Codes               | Hazard statement codes | Specific Concentration limit, M-Factor, Acute Toxic estimate (ATE) |
|-------|-----------|------------------------------------------------------------------------------------------------------|-------------------------------------------------|------------------------|--------------------|---------------------------------------------------------------------------------------------------------------------------------------------------------------|-----------------------------------------------|------------------------|--------------------------------------------------------------------|
| 13    |           | 5,5'-methylenebis(2-methoxy-4-propylphenol)                                                          | n.d.                                            | n.d.                   | n.d.               | <b>Restriction:</b> None<br><b>Authorisation SVHC:</b> None<br><b>Evaluation:</b> None<br><b>Registration:</b> None<br><b>CLP Notification:</b> None          | n.d.                                          | n.d.                   | n.d.                                                               |
| 14    |           | 3,3'-methylenebis(2,6-dimethoxy-4-propylphenol)                                                      | n.d.                                            | n.d.                   | n.d.               | <b>Restriction:</b> None<br><b>Authorisation SVHC:</b> None<br><b>Evaluation:</b> None<br><b>Registration:</b> None<br><b>CLP Notification:</b> None          | n.d.                                          | n.d.                   | n.d.                                                               |
| 15    |           | 7-(4-hydroxy-3,5-dimethoxyphenyl)-1,3-dimethoxynaphthalen-2-ol                                       | n.d.                                            | n.d.                   | n.d.               | <b>Restriction:</b> None<br><b>Authorisation SVHC:</b> None<br><b>Evaluation:</b> None<br><b>Registration:</b> None<br><b>CLP Notification:</b> None          | n.d.                                          | n.d.                   | n.d.                                                               |
| 16    |           | 4,4'-(5,5'-oxybis(methylene)bis(5-ethyl-1,3-dioxane-5,2-diyl))bis(methylene)bis(2,6-dimethoxyphenol) | n.d.                                            | n.d.                   | n.d.               | <b>Restriction:</b> None<br><b>Authorisation SVHC:</b> None<br><b>Evaluation:</b> None<br><b>Registration:</b> None<br><b>CLP Notification:</b> None          | n.d.                                          | n.d.                   | n.d.                                                               |
| 17    |           | bis(4-(hydroxymethyl)-2-methoxyphenyl) carbonate                                                     | n.d.                                            | n.d.                   | n.d.               | <b>Restriction:</b> None<br><b>Authorisation SVHC:</b> None<br><b>Evaluation:</b> None<br><b>Registration:</b> None<br><b>CLP Notification:</b> None          | n.d.                                          | n.d.                   | n.d.                                                               |
| 18    |           | (E)-4,4'-(ethene-1,2-diyl)bis(2-methoxyphenol)                                                       | (E)-4,4'-(ethene)-1,2-diyl)bis(2-methoxyphenol) | 943-241-5.             | n.d.               | <b>Restriction:</b> None<br><b>Authorisation SVHC:</b> None<br><b>Evaluation:</b> None<br><b>Registration:</b> None<br><b>CLP Notification:</b> C&L inventory | Acute Tox. 4<br>Skin Irrit. 2<br>Acute Tox. 4 | H302<br>H315<br>H332   | n.d.                                                               |
| 19    |           | 4,4'-(ethane-1,2-diyl)bis(2-methoxyphenol)                                                           | 4,4'-(ethane-1,2-diyl)bis(2-methoxyphenol)      |                        | 18256-53-6         | <b>Restriction:</b> None<br><b>Authorisation SVHC:</b> None<br><b>Evaluation:</b> None<br><b>Registration:</b> None<br><b>CLP Notification:</b> None          | n.d.                                          | n.d.                   | n.d.                                                               |

<sup>a</sup> Data Source: ECHA European Chemical Agency, <https://echa.europa.eu/it/home>; <sup>b,c</sup> European Community List Name and Number assigned by ECHA; <sup>d</sup> SVHC: Substance of Very High Concern; <sup>e</sup> CCH: Compliance Check Evaluation; <sup>f</sup> TPE: Testing Proposal Evaluation; <sup>g</sup> CLP: Classification Labelling and Packaging; <sup>h</sup> CLP: Classification Labelling and Packaging

Table S2(continued)

| Entry | Structure                                                                                                                                                                                                                                         | IUPAC name                                                | EC List name <sup>b</sup>                              | EC list N <sup>o</sup> | CAS N <sup>o</sup> | REACH Restriction, Authorisation SVHC <sup>d</sup> Evaluation, Registration; CLP <sup>g</sup> Notifications                                                                                       | Hazard Class and category Codes                           | Hazard statement codes       | Specific Concentration limit, M-Factor, Acute Toxic estimate (ATE) |
|-------|---------------------------------------------------------------------------------------------------------------------------------------------------------------------------------------------------------------------------------------------------|-----------------------------------------------------------|--------------------------------------------------------|------------------------|--------------------|---------------------------------------------------------------------------------------------------------------------------------------------------------------------------------------------------|-----------------------------------------------------------|------------------------------|--------------------------------------------------------------------|
| 20    | 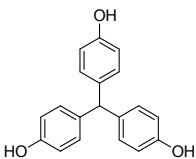                                                                                                                                                                 | 4-[bis(4-hydroxyphenyl)methyl]phenol                      | 4,4',4''-methylidinetrisphenol                         | 210-040-2.             | 603-44-1.          | <b>Restriction:</b> None<br><b>Authorisation SVHC:</b> None<br><b>Evaluation:</b> None<br><b>Registration:</b> pre-registered<br><b>CLP Notification:</b> C&L inventory                           | Skin Irrit. 2<br>Eye Irrit. 2                             | H315<br>H319                 | n.d.                                                               |
| 21    | <br>R <sub>1</sub> = H, OCH <sub>3</sub><br>R <sub>2</sub> = H, OCH <sub>3</sub><br>R <sub>3</sub> = H, OCH <sub>3</sub><br>R <sub>4</sub> = H, OCH <sub>3</sub> | -                                                         | n.d.                                                   | n.d.                   | n.d.               | <b>Restriction:</b> None<br><b>Authorisation SVHC:</b> None<br><b>Evaluation:</b> None<br><b>Registration:</b> None<br><b>CLP notification:</b> None                                              | n.d.                                                      | n.d.                         | n.d.                                                               |
| 22    | All possible combinations<br><br>R <sub>1</sub> = H, OCH <sub>3</sub><br>R <sub>2</sub> = H, OCH <sub>3</sub><br>R <sub>3</sub> = methyl, propyl                 | -                                                         | n.d.                                                   | n.d.                   | n.d.               | <b>Restrictions:</b> None<br><b>Authorisation SVHC:</b> None<br><b>Evaluation:</b> None<br><b>Registration:</b> None<br><b>CLP notification:</b> none                                             | n.d.                                                      | n.d.                         | n.d.                                                               |
| 23    |                                                                                                                                                                | 4,4'-methylenebis(5-isopropyl-2-methylphenol)             | n.d.                                                   | n.d.                   | n.d.               | <b>Restrictions:</b> None<br><b>Authorisation SVHC:</b> None<br><b>Evaluation:</b> None<br><b>Registration:</b> None<br><b>CLP notification:</b> none                                             | n.d.                                                      | n.d.                         | n.d.                                                               |
| 24    |                                                                                                                                                                | 2,2,4,4-tetramethylcyclobutane-1,3-diol ( <b>TMCBDO</b> ) | 2,2,4,4-tetramethylcyclobutane-1,3-diol, mixed isomers | 221-140-0              | 3010-96-6          | <b>Restrictions:</b> None<br><b>Authorisation SVHC:</b> None<br><b>Evaluation:</b> CCH, Comprehensive; concluded<br><b>Registration:</b> pre-registered<br><b>CLP notification:</b> C&L inventory | Acute Tox 4<br>Skin Irrit. 2<br>Eye Irrit. 2<br>STOT SE 3 | H302<br>H315<br>H319<br>H335 | n.d.                                                               |

<sup>a</sup> Data Source: ECHA European Chemical Agency, <https://echa.europa.eu/it/home>; <sup>b,c</sup> European Community List Name and Number assigned by ECHA; <sup>d</sup> SVHC: Substance of Very High Concern; <sup>e</sup> CCH: Compliance Check Evaluation; <sup>f</sup> TPE: Testing Proposal Evaluation; <sup>g</sup> CLP: Classification Labelling and Packaging;



**Annex to Table S1 and S2** (see : ECHA European Chemical Agency, <https://echa.europa.eu/it/home>)

## **REACH : Phases of Registration, Evaluation, Authorisation and Restriction of Chemical Regulation**

### **1) REACH-Registration**

**Registered substances factsheet**(Substances registered which can be placed on the EEA market with a valid registration)

- Pre-registered substances
- Annex III: criteria for 1-10 tonne registered substances
- Annex IV: substances exempt for registration (Art 2(7)(a))
- Annex V: substances exempt for registration (art 2(7)(b))
- Registration statistics

### **2) REACH-Evaluation**

#### **Decision Type**

- TPE:Testing Proposal Evaluation
- CCH:Compliance Check Evaluation

#### **Scope**

- Targeted: only on some endpoints under ECHA's strategy
- Comprehensive: on all relevant endpoints under ECHA's strategy
- Testing Proposal: on the testing proposal submitted

**Dossier Evaluation Status(of Testing proposal public consultation and CCH)**(Details of dossiers of compliance checks evaluation and testing proposals)

- Under assessment
- Ongoing
- Information requested
- Follow up
- Concluded

**Substance Evaluation CoRAP List** (Details of substances evaluation by member state competent authorities)

### **3) REACH-Authorisation for Substances of Very High Concern (SVHC)**

**Registry of SVHC for authorization** (Substances identified as SVHC)

- Substances of Very High Concern identification

**Candidate List of SVHC for authorization**(Substances to be considered for potential authorisation at EU level)

- Candidate List substance in articles
- Submitted recommendations-SVHCs for authorisation

**Authorisation List**(Substance in REACH Annex XIV: for which an authorisation is required to be used)

- Adopted opinions and previous public consultations on Publications
- Public consultations (ongoing)
- Register of downstream user notifications of authorized uses

#### **Type of SVHC**

**CMR** Carcinogenic category 1A or 1B, according to the art. 57(a)

Mutagenic category 1A or 1B, according to the art. 57(b)

Toxic for reproduction category 1A or 1B, according to the art. 57(c)

**PBT** Persistent Bioaccumulative and Toxic, according to the art. 57(d)

**vPvB** Very Persistent very Bioaccumulative, according to the art. 57(e)

**Equivalent level of concern having probable serious effects to human health and/or to environment**, according to the art. 57(f)

#### **4) REACH-Restriction**

**Registry of restriction intentions until outcome** (Substances intended to be restricted and entered in annex XVII to REACH)

- Current activities on restrictions
- Complete activities on restriction

**Restriction List**(REACH Annex XVII: substances for which certain uses are restricted under REACH at EU level)

- Submitted restrictions under considerations (current consultations)
- Current calls for comments and evidence
- Previous calls for comments and evidence
- Consultations on new scientific evidence

### **CLP: Classification, Labelling and Packaging**

**1) C&L inventory**(List of substances with a CLP notification to ECHA by manufacturers and importers)

- Table of the harmonized entries in annex VI to CLP

**2) Registry of CLH Intentions until outcome**(Proposal for new or updates to existing harmonised classification and labelling of substances)

- Harmonised classification and labelling public consultations
- Harmonised classification and labelling targeted consultations
- Consultations on ECHA's Executive Director's requests related to the CLH process
